# Supplementary material for: Dual‐Zinc Electrode Electrochemical Desalination
Source: PubMed Central journal article supplement (PMC7318675; doi:10.1002/cssc.202000188), 2020-03-19
Supplement: CSSC-13-2792-s001.pdf [file CSSC-13-2792-s001.pdf]

# ChemSusChem

Supporting Information

## Dual-Zinc Electrode Electrochemical Desalination

Jinhong Dai,<sup>[a]</sup> Jian Wang,<sup>[a]</sup> Xianhua Hou,<sup>[a]</sup> Qiang Ru,<sup>[a]</sup> Qingyu He,<sup>\*[a]</sup> Pattarachai Srimuk,<sup>[b, c]</sup>  
Volker Presser,<sup>\*[b, c]</sup> and Fuming Chen<sup>\*[a]</sup>

Supplementary Information

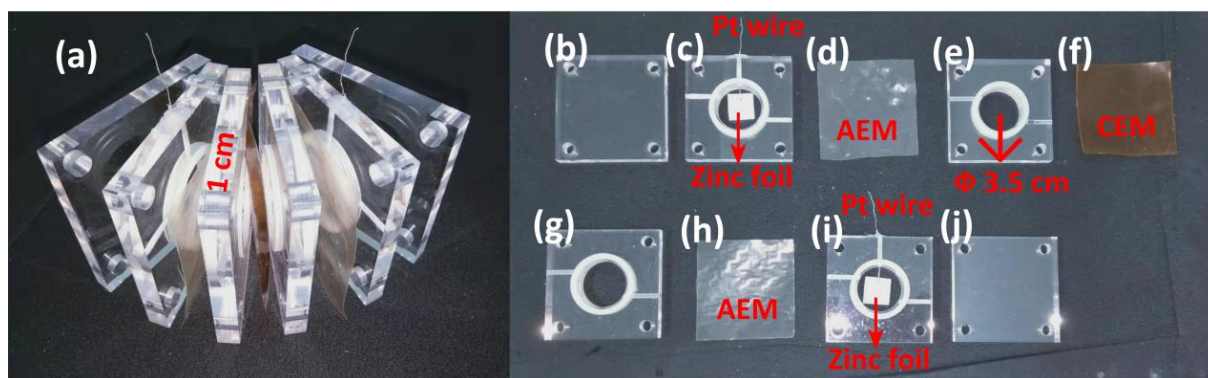

**Figure S1.** The compartment photograph of continuous redox electrochemical desalination, (a) the assembled structure of deionization device, and the separated parts (b-j), the device (a) can be obtained by assembling (b-j) in sequence.

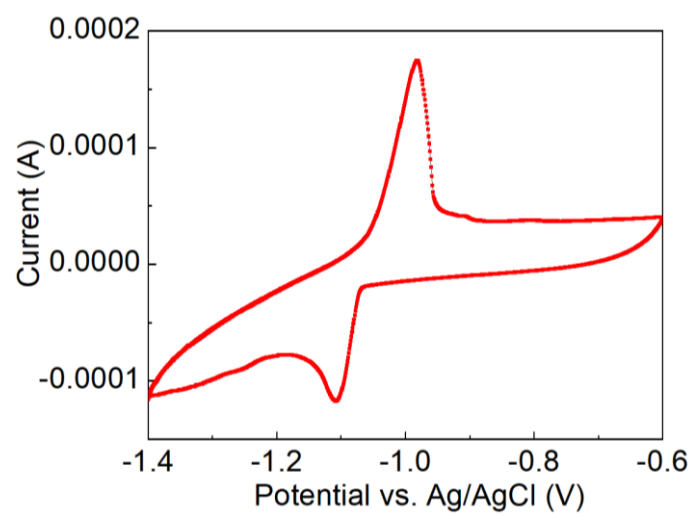

**Figure S2.** The three-electrode cyclic voltammogram of zinc in the  $\text{ZnCl}_2$  electrolyte.

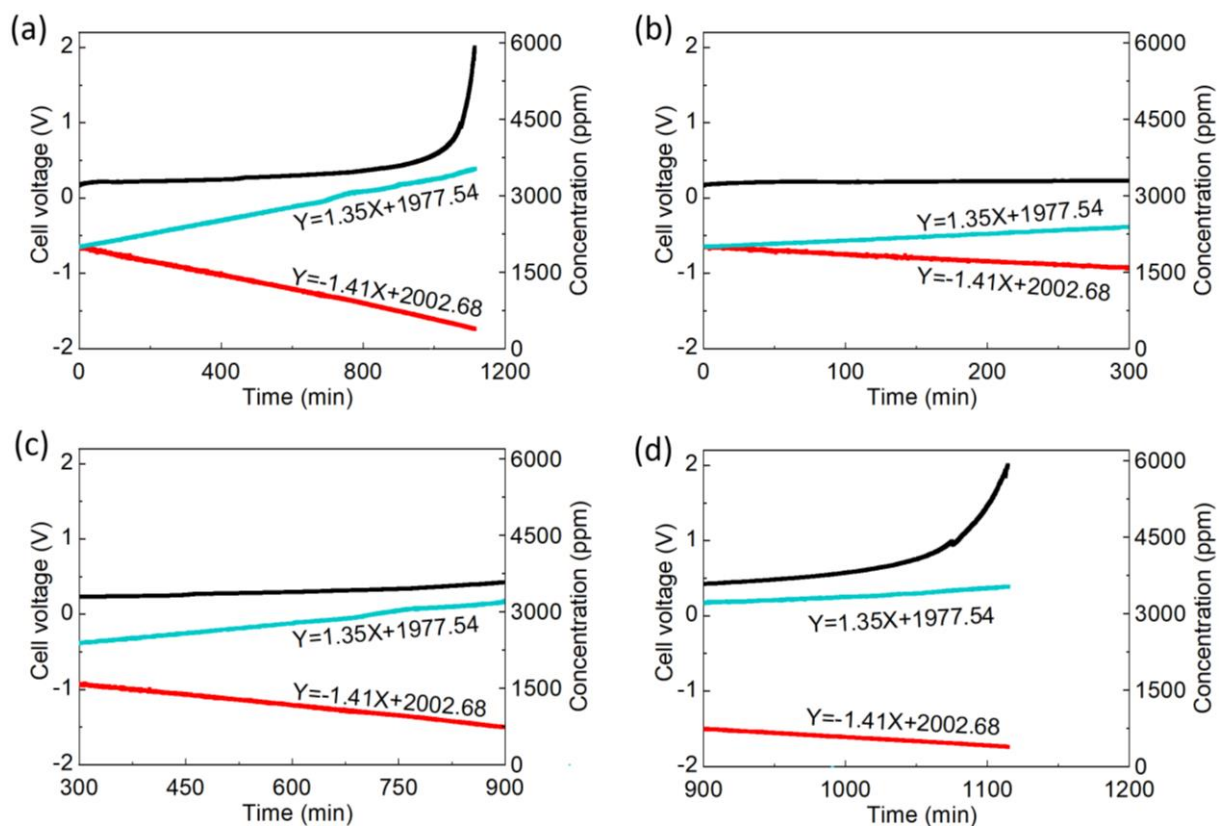

**Figure S3.** (a) The continuous desalination performance of dual-zinc electrode redox electrochemical process at the  $0.25 \text{ mA}\cdot\text{cm}^{-2}$  current density, (b-d) the zoom-in section at different times.

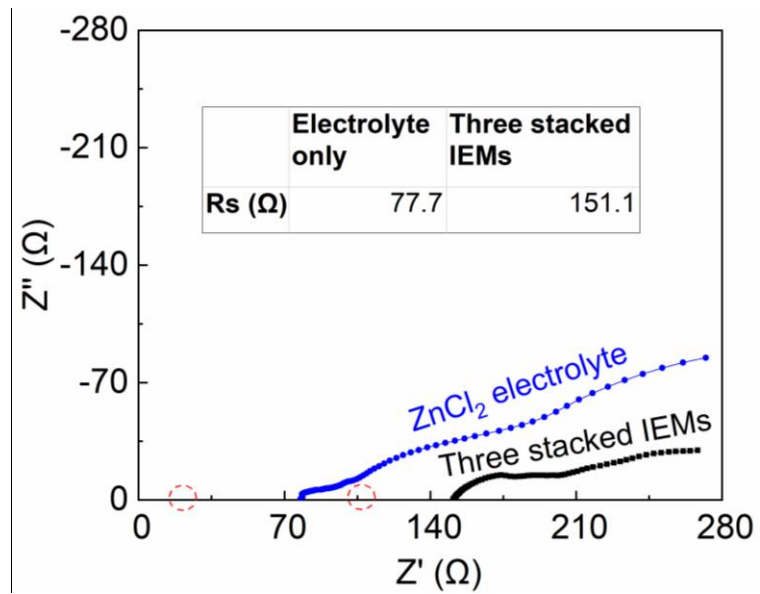

**Figure S4.** EIS results of electrolyte only ( $\text{ZnCl}_2$  without membranes) and three stacked ion exchanged membranes, and the corresponding solution resistance ( $R_s$ )

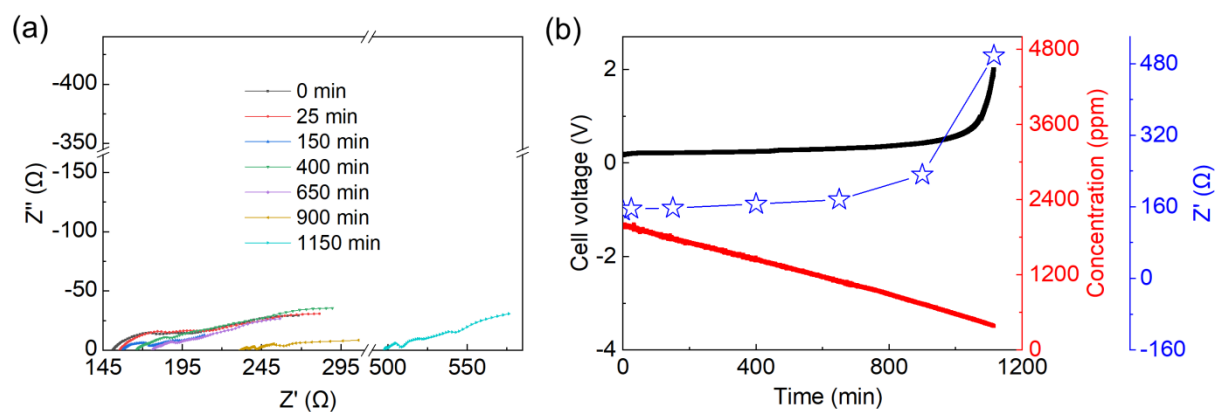

**Figure S5.** (a) EIS results of three stacked ion exchanged membranes during the desalination, and (b) the corresponding change of cell voltage, salt concentration in dilute stream, and solution resistance ( $R_s$ )

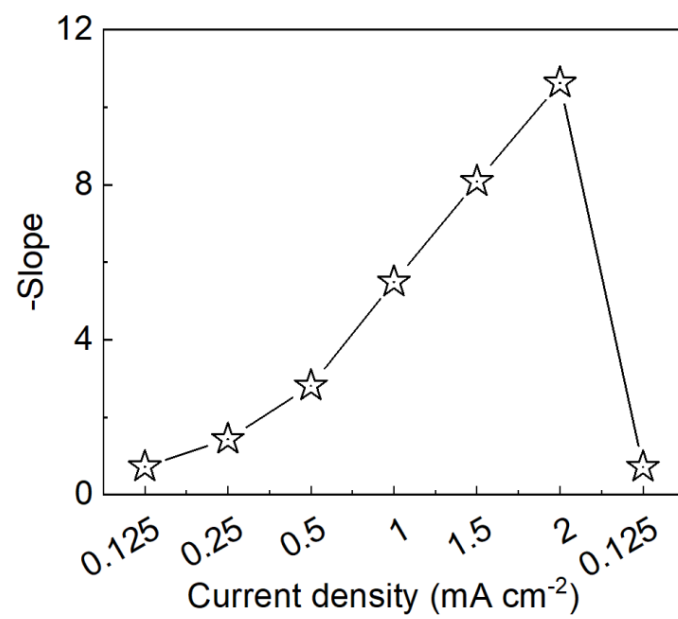

**Figure S6.** The negative slope at various current densities in Figure 2a

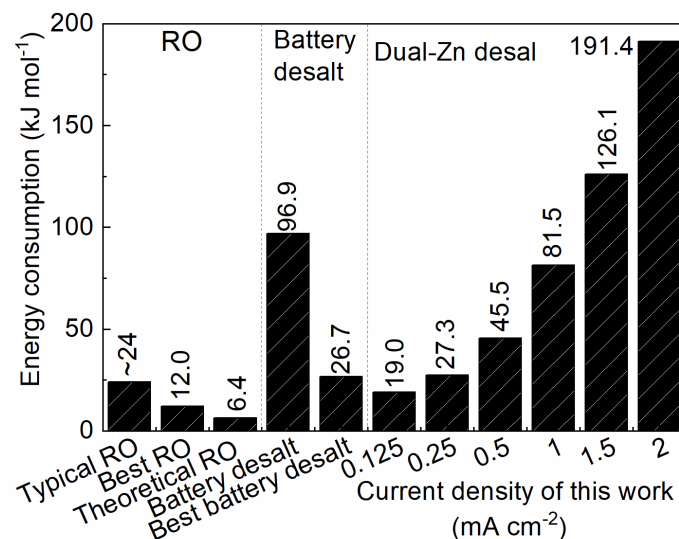

**Figure S7.** Comparison of energy consumption for RO, battery desalination, and the current dual-zinc desalination with a variety of current densities. The energy consumption of typical RO is around 24 kJ mol<sup>-1</sup> salts while the best energy consumption achieved by RO is 12.03 kJ mol<sup>-1</sup>.<sup>1-3</sup> The theoretical energy consumption by RO is 1.06 kWh m<sup>-3</sup> at 50% water recovery (converting to 6.38 kJ mol<sup>-1</sup>). Energy consumption by typical battery desalting,<sup>4</sup> best reported battery desalting,<sup>5</sup> results in the current work were obtained in 0.125-2 mA cm<sup>-2</sup>.



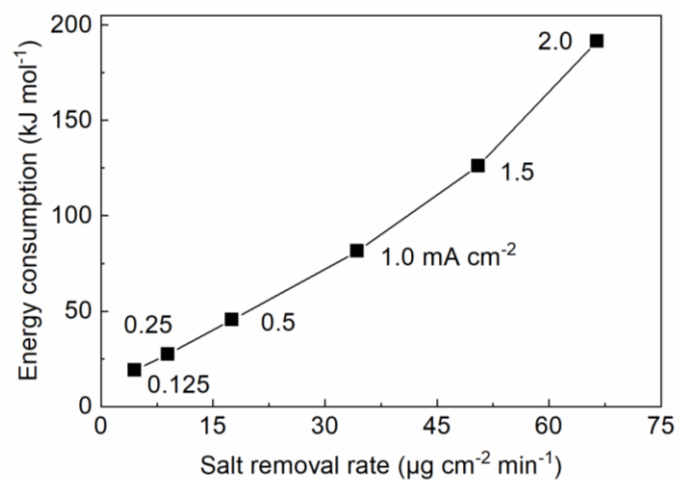

**Figure S8.** The curve of energy consumption vs. salt removal rate at different current densities.

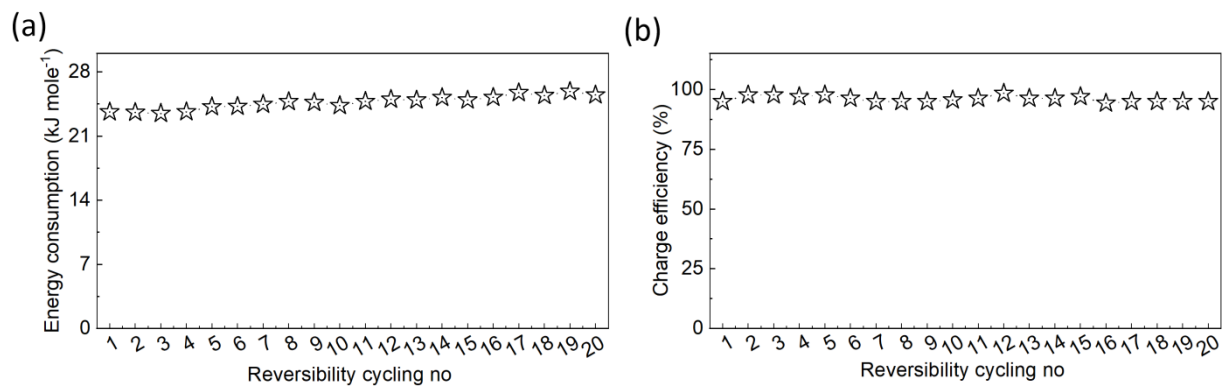

**Figure S9.** The energy consumption (a) and charge efficiency (b) during the reversibility cycling in Figure 3 at a current density of  $\pm 0.25 \text{ mA}\cdot\text{cm}^{-2}$ .

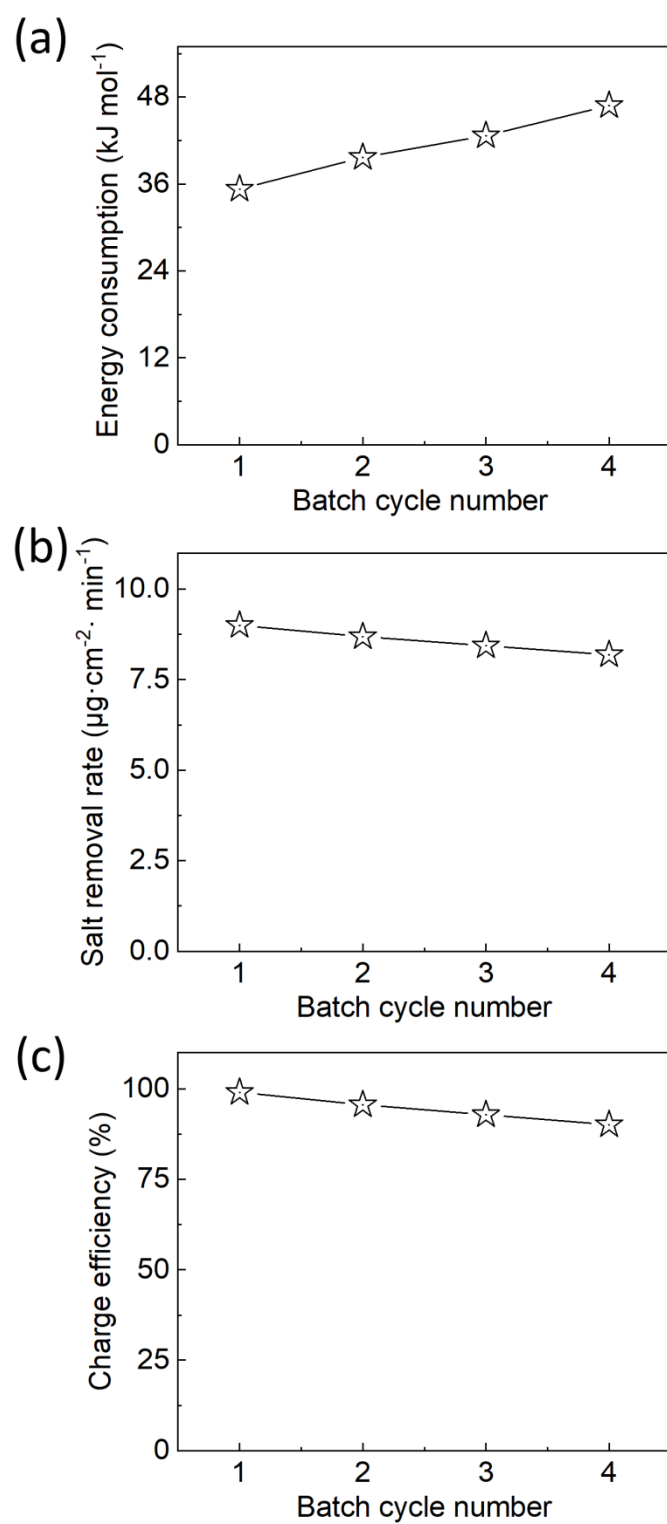

**Figure S10.** The energy consumption (a), salt removal rate (b), and charge efficiency (c) during the batch cycling (Figure 4).

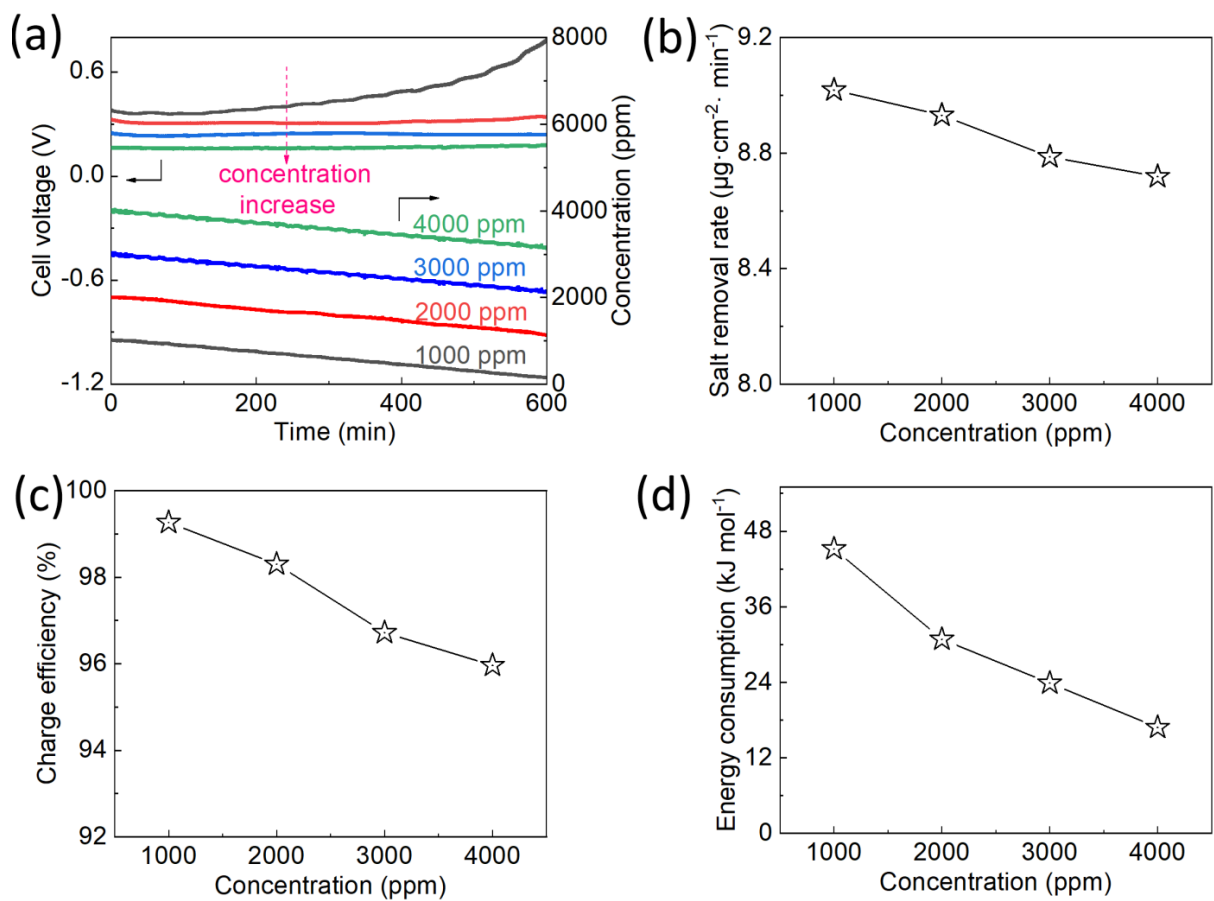

**Figure S11.** The influence of salt concentration, (a) the curves of voltage and the corresponding salt concentration change in the diluted stream at varied concentrations; the corresponding performance of the salt removal rate (b), charge efficiency (c), energy consumption (d).

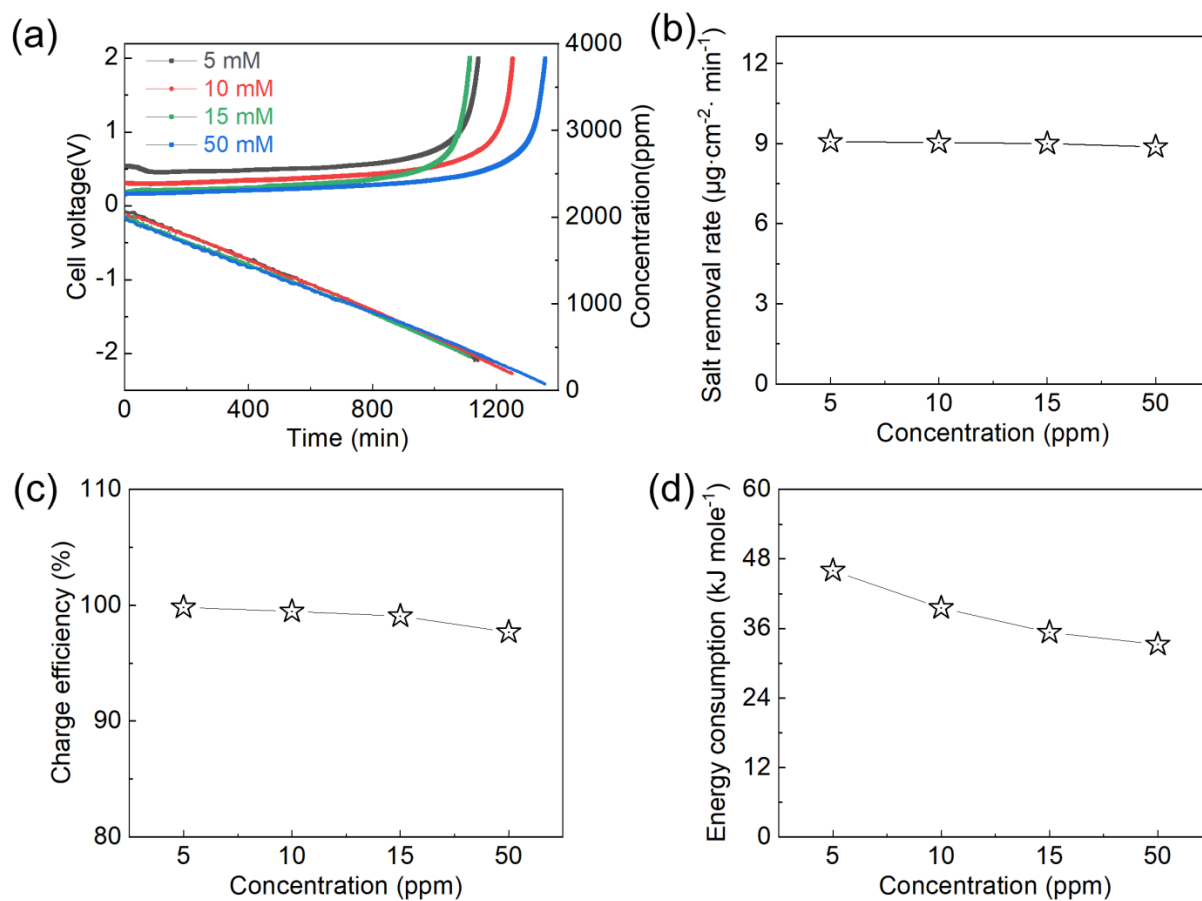

**Figure S12.** The influence of ZnCl<sub>2</sub> electrolyte concentration, (a) the curves of voltage and the corresponding salt concentration change in the diluted stream at varied ZnCl<sub>2</sub> electrolyte concentrations; the corresponding performance of the salt removal rate (b), charge efficiency (c), energy consumption (d).

**Table S1.** The comparison of the salt grown rate in stream 1 and the salt removal rate in stream 2 at different currents.

| Item                                                                        | Stream | Current density (mA·cm <sup>-2</sup> ) |      |      |      |      |      |       |
|-----------------------------------------------------------------------------|--------|----------------------------------------|------|------|------|------|------|-------|
|                                                                             |        | 0.125                                  | 0.25 | 0.5  | 1    | 1.5  | 2    | 0.125 |
| Salt concentration change rate<br>(μg·cm <sup>-2</sup> ·min <sup>-1</sup> ) | 1      | 4.5                                    | 9.0  | 17.6 | 34.4 | 50.6 | 66.4 | 4.4   |
|                                                                             | 2      | 4.9                                    | 9.8  | 17.0 | 35.0 | 50.0 | 67.1 | 4.6   |

**Table S2.** The comparison of salt removal/release rates in stream 1 and 2 during the reversibility cycling tests.

| Item                                                                                       | Cycle number | Stream |     |
|--------------------------------------------------------------------------------------------|--------------|--------|-----|
|                                                                                            |              | 1      | 2   |
| Salt concentration change rate<br>( $\mu\text{g}\cdot\text{cm}^{-2}\cdot\text{min}^{-1}$ ) | 1            | 8.6    | 8.8 |
|                                                                                            | 2            | 8.9    | 9.0 |
|                                                                                            | 3            | 8.9    | 8.6 |
|                                                                                            | 4            | 8.8    | 8.4 |
|                                                                                            | 5            | 8.9    | 8.8 |
|                                                                                            | 6            | 8.8    | 8.9 |
|                                                                                            | 7            | 8.6    | 8.9 |
|                                                                                            | 8            | 8.6    | 8.6 |
|                                                                                            | 9            | 8.6    | 8.7 |
|                                                                                            | 10           | 8.7    | 8.5 |
|                                                                                            | 11           | 8.8    | 9.3 |
|                                                                                            | 12           | 8.9    | 8.3 |
|                                                                                            | 13           | 8.8    | 8.4 |
|                                                                                            | 14           | 8.8    | 8.4 |
|                                                                                            | 15           | 8.8    | 8.4 |
|                                                                                            | 16           | 8.6    | 8.3 |
|                                                                                            | 17           | 8.6    | 8.7 |
|                                                                                            | 18           | 8.6    | 8.8 |
|                                                                                            | 19           | 8.6    | 9.0 |
|                                                                                            | 20           | 8.6    | 8.8 |

## References:

1. S. Choi, B. Chang, J. H. Kang, M. S. Diallo and J. W. Choi, *Journal of Membrane Science*, 2017, **541**, 580-586.
2. M. Elimelech and W. A. Phillip, *Science*, 2011, **333**, 712-717.
3. S. Lin and M. Elimelech, *Desalination*, 2015, **366**, 9-14.
4. F. Chen, Y. Huang, L. Guo, L. Sun, Y. Wang and H. Y. Yang, *Energy & Environmental Science*, 2017, **10**, 2081-2089.
5. Y. Huang, F. Chen, L. Guo, J. Zhang, T. Chen and H. Y. Yang, *Desalination*, 2019, **451**, 241-247.
1. R. Zhao, S. Porada, P. M. Biesheuvel and A. van der Wal, *Desalination*, 2013, **330**, 35-41.
2. S. Choi, B. Chang, J. H. Kang, M. S. Diallo and J. W. Choi, *Journal of Membrane Science*, 2017, **541**, 580-586.
3. M. Elimelech and W. A. Phillip, *Science*, 2011, **333**, 712-717.
4. S. Lin and M. Elimelech, *Desalination*, 2015, **366**, 9-14.
5. F. Chen, Y. Huang, L. Guo, L. Sun, Y. Wang and H. Y. Yang, *Energy & Environmental Science*, 2017, **10**, 2081-2089.
6. Y. Huang, F. Chen, L. Guo, J. Zhang, T. Chen and H. Y. Yang, *Desalination*, 2019, **451**, 241-247.
